# Supplementary material for: Stepwise ex situ carbon-coated LMFP/C cathodes for high-energy lithium-ion batteries
Source: Research Square preprint supplement (doi:10.21203/rs.3.rs-8260827/v1), 2026-01-09
Supplement: Supplementary file 1 [file 458400d3cd7fdc718cf999ba.docx]

**Supporting Information**

Stepwise ex situ carbon-coated LMFP/C cathodes for high-energy lithium-ion batteries

Wenchong Cheng 1, Guoqiang Song 1, *, Zuming Huang 1, Qiming Zhao3, Peng Xiong 1, Linjun Zhang 1, Zhentian Xu 1, Hao Tang 1, Ting Wei 1, Yuxi Li 1, Yiwen Xie 1, Claudia Li 2, Sibudjing Kawi 2

1 School of Intelligent Materials and New Energy, Institute of Carbon Neutral New Energy, Yuzhang Normal University, Nanchang 330031, China

2 Department of Chemical and Biomolecular Engineering, National University of Singapore, 4 Engineering Drive 4, Singapore 117585, Singapore

3 School of Physics and Electronic Engineering, Fuyang Normal University, Fuyang 236037, China


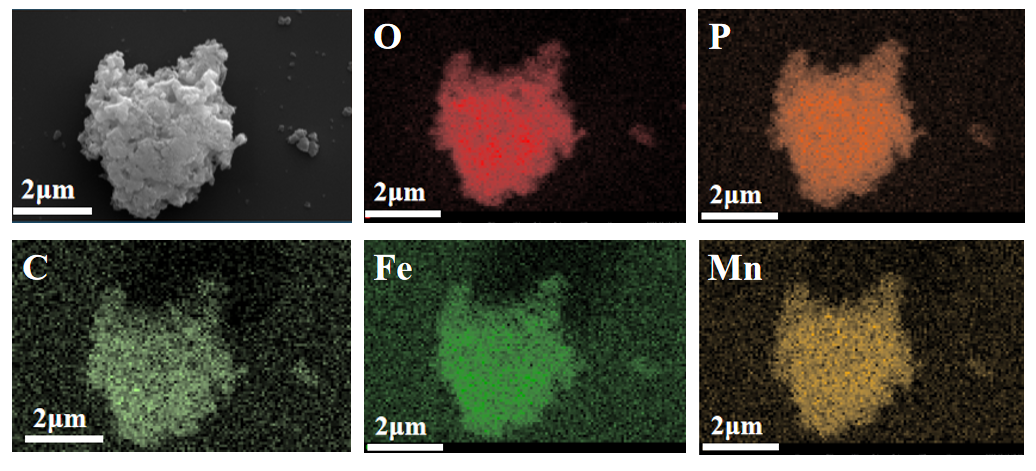


Fig. S1. the elemental mapping images of O-LMFP


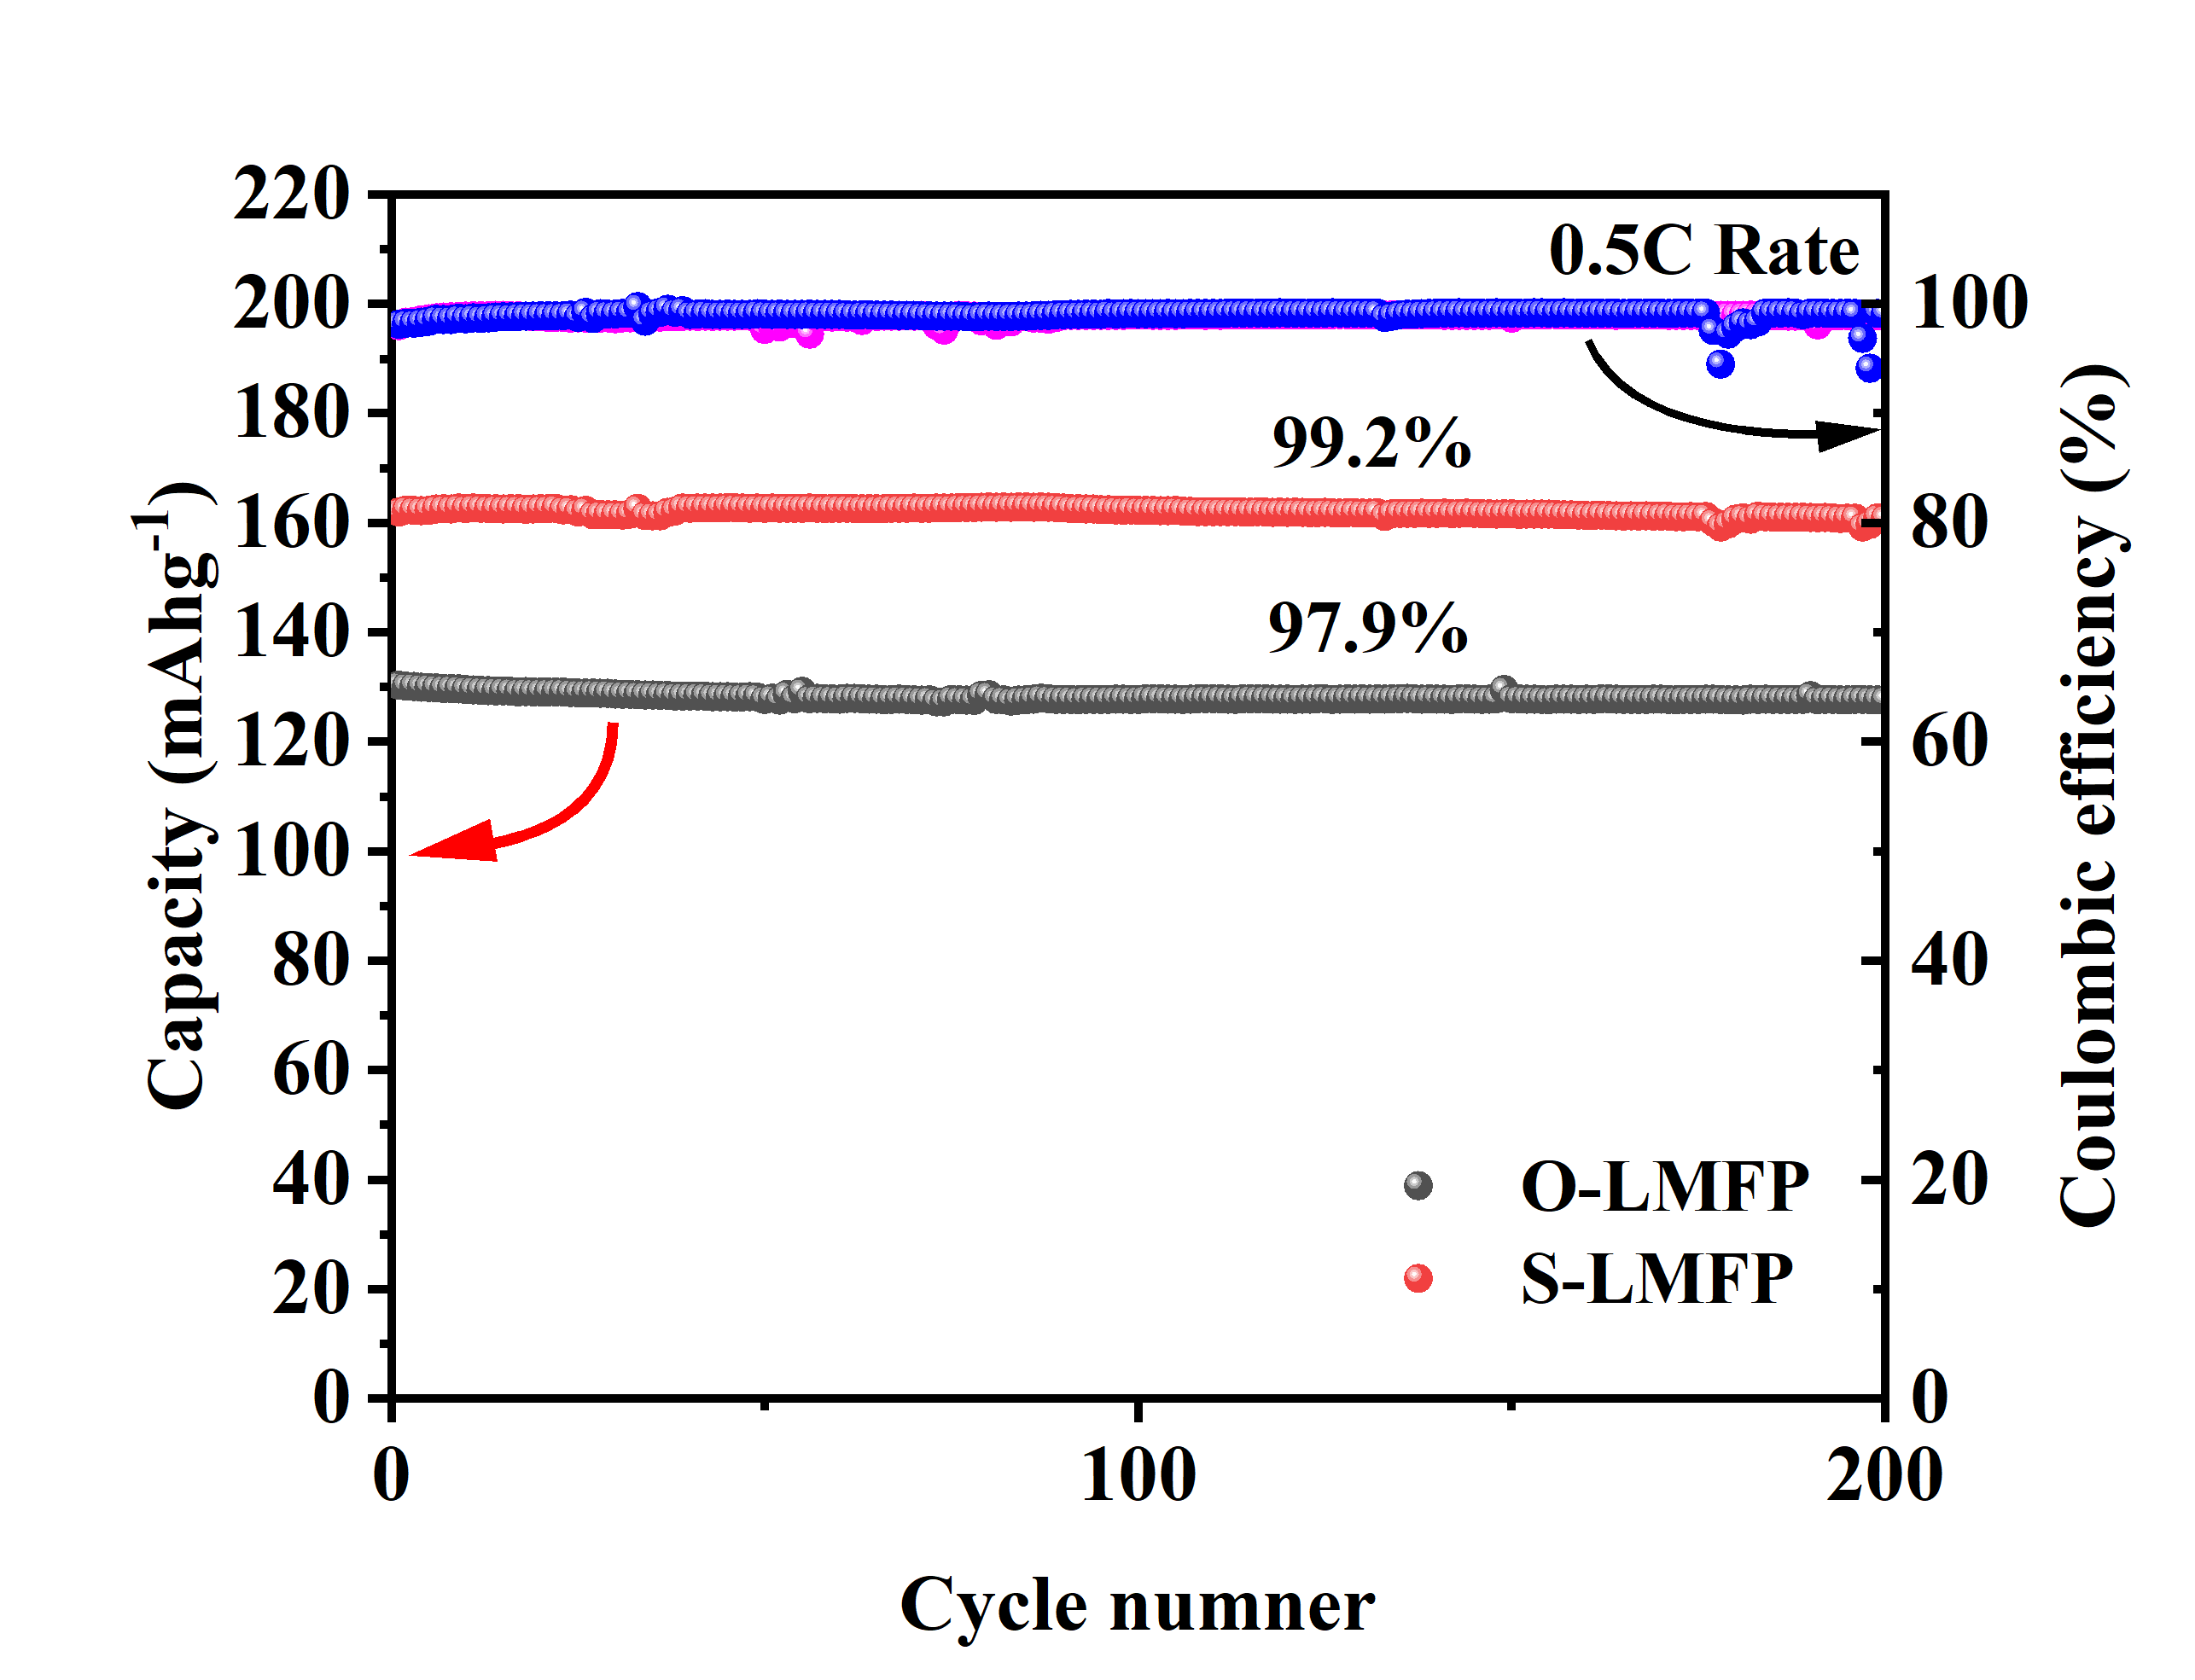


Fig. S2. Cycling performance at 0.5C of O-LMFP and S-LMFP.
